# Supplementary material
Source: MDPI journal article supplement (https://www.mdpi.com/2076-3417/12/17/8576)
Supplement: s1 [file s1]

## Supplementary Material

Table S1. CAAQS management levels.

| Management Level | Max 8 h Daily Avg O <sub>3</sub> (ppb) |       | PM <sub>2.5</sub> annual (µg m <sup>-3</sup> ) | PM <sub>2.5</sub> 24 h (µg m <sup>-3</sup> ) | NO <sub>2</sub> annual (ppb) |         | NO <sub>2</sub> 1 h (ppb) |       | Action                                                                          |
|------------------|----------------------------------------|-------|------------------------------------------------|----------------------------------------------|------------------------------|---------|---------------------------|-------|---------------------------------------------------------------------------------|
|                  | 2020                                   | 2025  | 2020                                           | 2020                                         | 2020                         | 2025    | 2020                      | 2025  |                                                                                 |
| Red (CAAQS)      | >62                                    | >60   | >8.8                                           | >27                                          | >17                          | >12.0   | >60                       | >42   | Reduce pollutant levels through advanced management actions                     |
| Orange           | 57–62                                  | 57–60 | 6.5–8.8                                        | 20–27                                        | 7.1–17                       | 7.1–17  | 32–60                     | 32–60 | Improve air quality through active air management and prevent exceedance        |
| Yellow           | 51–56                                  | 51–56 | 4.1–6.4                                        | 11–19                                        | 2.1–7.0                      | 2.1–7.0 | 21–31                     | 21–31 | Improve air quality using early and ongoing actions for continuous improvement  |
| Green            | ≤50                                    | ≤50   | ≤4.0                                           | ≤0                                           | ≤2                           | ≤2      | ≤20                       | ≤20   | Maintain air quality through proactive air management to keep clean areas clean |

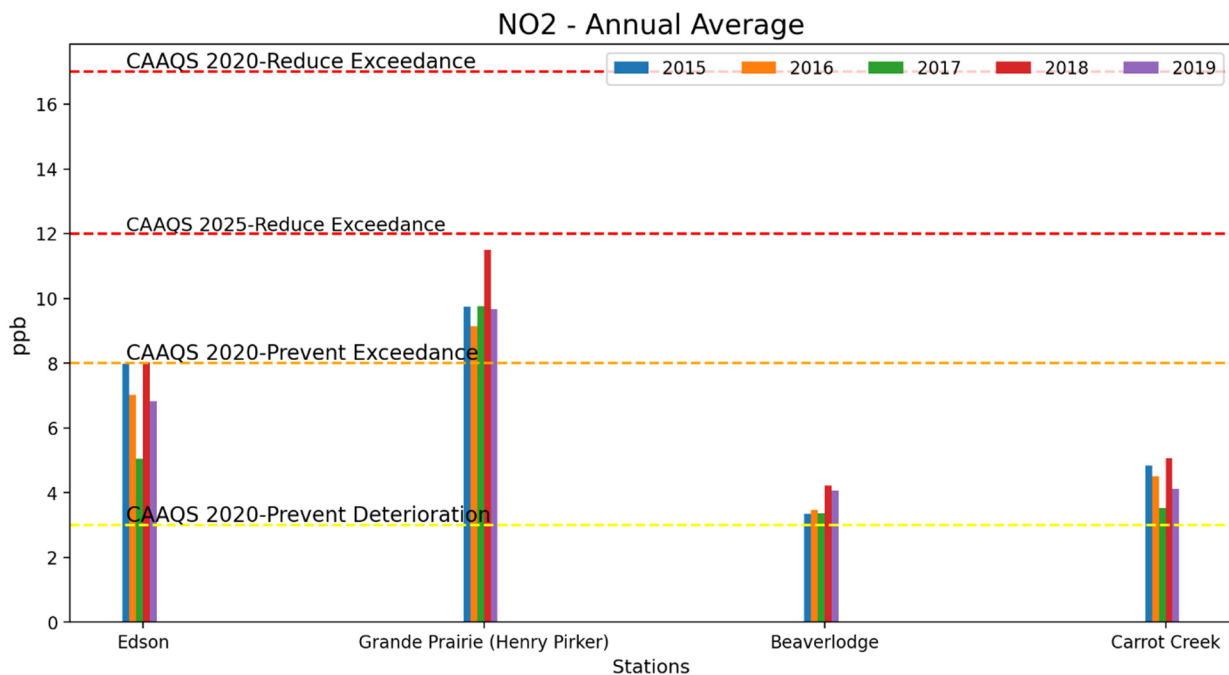

Figure S1. Historical annual average NO<sub>2</sub>.

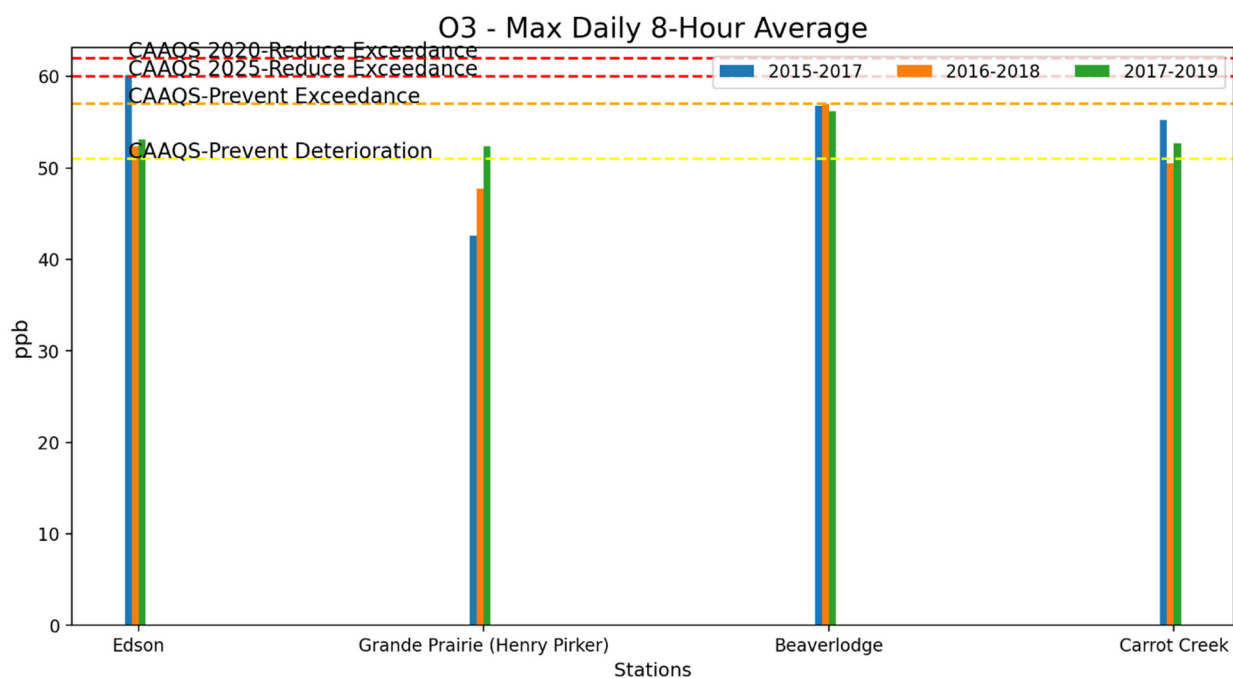

**Figure S2.** Historical 3-year annual average 4<sup>th</sup> highest daily max 8 h O<sub>3</sub>.

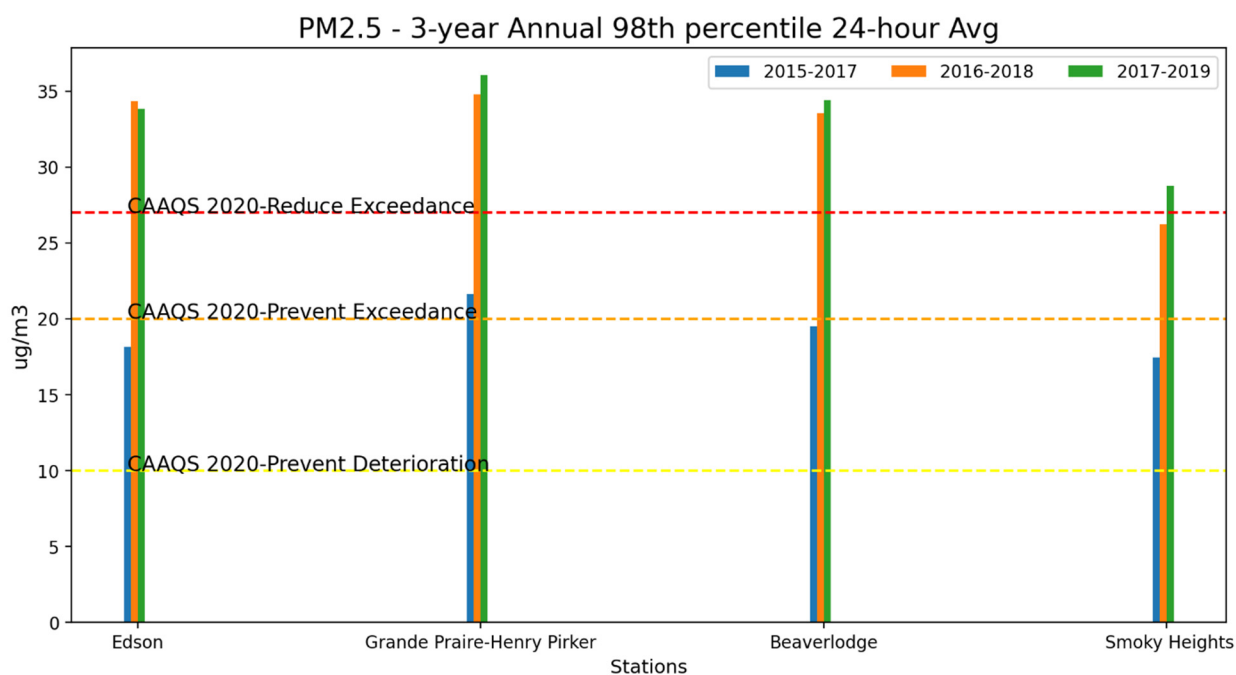

**Figure S3.** Historical daily average PM<sub>2.5</sub>.

**Table S2.** Model species and their descriptions.

| Model Species    | Description                                               | Molecular Weight |
|------------------|-----------------------------------------------------------|------------------|
| ASO <sub>4</sub> | Sulfate                                                   | 96               |
| ANO <sub>3</sub> | Nitrate                                                   | 62               |
| ANH <sub>4</sub> | Ammonium                                                  | 18               |
| AEC              | Elemental Carbon                                          | 12               |
| ANA              | Sodium                                                    | 23               |
| ACL              | Chloride                                                  | 35.5             |
| AXYL1            | Semivolatile High-NO <sub>x</sub> SOA product from Xylene | 174              |

|       |                                                       |       |
|-------|-------------------------------------------------------|-------|
| AXYL2 | Semivolaitle High-NOx SOA product from Xylene         | 185   |
| AXYL3 | Low-Volatility Low-NOx SOA product from Xylene        | 218   |
| ATOL1 | Semivolatile High-NOx SOA product from Toluene        | 163   |
| ATOL2 | Semivolaitle High-NOx SOA product from Toluene        | 175   |
| ATOL3 | Low-Volatility Low-NOx SOA product from Toluene       | 194   |
| ABNZ1 | Semivolatile High-NOx SOA product from Benzene        | 161   |
| ABNZ2 | Semivolatile High-NOx SOA product from Benzene        | 134   |
| ABNZ3 | Low-Volatility Low-NOx SOA product from Benzene       | 180   |
| AISO1 | Semivolatile SOA product from Isoprene                | 132   |
| AISO2 | High-Volatility SOA product from Isoprene             | 133   |
| AISO3 | Acid-catalyzed Isoprene Epoxydiol SOA                 | 168.2 |
| ATRP1 | Semivolatile SOA product from Monoterpenes            | 177   |
| ATRP2 | High-Volatility SOA product from Monoterpenes         | 198   |
| ASQT  | Semivolatile SOA product from Sesquiterpenes          | 273   |
| AOLGA | Oligomer products of anthropogenic SOA compounds      | 206   |
| AOLGB | Oligomer products of biogenic SOA compounds           | 248   |
| AORGC | Glyoxal and methylglyoxal SOA produced in cloud water | 177   |

---
